# Supplementary material for: Aluminal speciation in the crystal nucleus: a mass spectral interpretation
Source: Royal Society of Chemistry journal article supplement (doi:10.1039/c6ra11209a), 2016-01-01
Supplement: c6ra11209a1.xlsx [file c6ra11209a1.xlsx]

## Sheet: allpositive,_observed
s	ring	k	n	p	q	r	x	m	z	m/z (fractional)	m/z	m/z (observed)	species	formula: cationic(,anionic)	c	m(n,p,q,r)	m(x)	formula(cationic part)	formula(anionic part)	ring formula
4	0	0	6	0	0	14	0	414	18	23	23			[Al6(OH2)14]18+				[Al6(OH2)14]	[Al(OH)4]
4	0	0	5	0	0	12	0	351	15	23.4	23.4			[Al5(OH2)12]15+				[Al5(OH2)12]	[Al(OH)4]
4	0	0	4	0	0	10	0	288	12	24	24			[Al4(OH2)10]12+				[Al4(OH2)10]	[Al(OH)4]
4	0	0	6	0	1	13	0	413	17	24.2941	24.2941			[Al6(OH)(OH2)13]17+				[Al6(OH)(OH2)13]	[Al(OH)4]
4	0	0	3	0	0	8	0	225	9	25	25			[Al3(OH2)8]9+				[Al3(OH2)8]	[Al(OH)4]
4	0	0	5	0	1	11	0	350	14	25	25			[Al5(OH)(OH2)11]14+				[Al5(OH)(OH2)11]	[Al(OH)4]
4	0	0	6	0	2	12	0	412	16	25.75	25.75			[Al6(OH)2(OH2)12]16+				[Al6(OH)2(OH2)12]	[Al(OH)4]
4	0	0	4	0	1	9	0	287	11	26.0909	26.0909			[Al4(OH)(OH2)9]11+				[Al4(OH)(OH2)9]	[Al(OH)4]
4	0	0	5	0	2	10	0	349	13	26.8462	26.8462			[Al5(OH)2(OH2)10]13+				[Al5(OH)2(OH2)10]	[Al(OH)4]
4	0	0	2	0	0	6	0	162	6	27	27			[Al2(OH2)6]6+				[Al2(OH2)6]	[Al(OH)4]
4	0	0	6	0	3	11	0	411	15	27.4	27.4			[Al6(OH)3(OH2)11]15+				[Al6(OH)3(OH2)11]	[Al(OH)4]
4	0	0	3	0	1	7	0	224	8	28	28			[Al3(OH)(OH2)7]8+				[Al3(OH)(OH2)7]	[Al(OH)4]
4	0	0	4	0	2	8	0	286	10	28.6	28.6			[Al4(OH)2(OH2)8]10+				[Al4(OH)2(OH2)8]	[Al(OH)4]
4	0	0	5	0	3	9	0	348	12	29	29			[Al5(OH)3(OH2)9]12+				[Al5(OH)3(OH2)9]	[Al(OH)4]
4	0	0	6	0	4	10	0	410	14	29.2857	29.2857			[Al6(OH)4(OH2)10]14+				[Al6(OH)4(OH2)10]	[Al(OH)4]
4	0	0	6	2	0	12	0	410	14	29.2857	29.2857			[Al6 O2(OH2)12]14+				[Al6 O2(OH2)12]	[Al(OH)4]
4	0	0	6	0	5	9	0	409	13	31.4615	31.4615			[Al6(OH)5(OH2)9]13+				[Al6(OH)5(OH2)9]	[Al(OH)4]
4	0	0	6	2	1	11	0	409	13	31.4615	31.4615			[Al6 O2(OH)(OH2)11]13+				[Al6 O2(OH)(OH2)11]	[Al(OH)4]
4	0	0	5	0	4	8	0	347	11	31.5455	31.5455			[Al5(OH)4(OH2)8]11+				[Al5(OH)4(OH2)8]	[Al(OH)4]
4	0	0	5	2	0	10	0	347	11	31.5455	31.5455			[Al5 O2(OH2)10]11+				[Al5 O2(OH2)10]	[Al(OH)4]
4	0	0	4	0	3	7	0	285	9	31.6667	31.6667			[Al4(OH)3(OH2)7]9+				[Al4(OH)3(OH2)7]	[Al(OH)4]
4	0	0	3	0	2	6	0	223	7	31.8571	31.8571			[Al3(OH)2(OH2)6]7+				[Al3(OH)2(OH2)6]	[Al(OH)4]
4	0	0	2	0	1	5	0	161	5	32.2	32.2			[Al2(OH)(OH2)5]5+				[Al2(OH)(OH2)5]	[Al(OH)4]
4	0	0	1	0	0	4	0	99	3	33	33			[Al(OH2)4]3+				[Al(OH2)4]	[Al(OH)4]
6	1	0	6	0	0	24	0	594	18	33	33							[Al6(OH2)24]	[Al(OH)4]
4	0	0	6	0	6	8	0	408	12	34	34			[Al6(OH)6(OH2)8]12+				[Al6(OH)6(OH2)8]	[Al(OH)4]
4	0	0	6	2	2	10	0	408	12	34	34			[Al6 O2(OH)2(OH2)10]12+				[Al6 O2(OH)2(OH2)10]	[Al(OH)4]
4	0	0	5	0	5	7	0	346	10	34.6	34.6			[Al5(OH)5(OH2)7]10+				[Al5(OH)5(OH2)7]	[Al(OH)4]
4	0	0	5	2	1	9	0	346	10	34.6	34.6			[Al5 O2(OH)(OH2)9]10+				[Al5 O2(OH)(OH2)9]	[Al(OH)4]
6	0	0	6	0	0	26	0	630	18	35	35			[Al6(OH2)26]18+				[Al6(OH2)26]	[Al(OH)4]
6	0	0	5	0	0	22	0	531	15	35.4	35.4			[Al5(OH2)22]15+				[Al5(OH2)22]	[Al(OH)4]
4	0	0	4	0	4	6	0	284	8	35.5	35.5			[Al4(OH)4(OH2)6]8+				[Al4(OH)4(OH2)6]	[Al(OH)4]
4	0	0	4	2	0	8	0	284	8	35.5	35.5			[Al4 O2(OH2)8]8+				[Al4 O2(OH2)8]	[Al(OH)4]
6	0	0	4	0	0	18	0	432	12	36	36			[Al4(OH2)18]12+				[Al4(OH2)18]	[Al(OH)4]
6	0	0	3	0	0	14	0	333	9	37	37			[Al3(OH2)14]9+				[Al3(OH2)14]	[Al(OH)4]
4	0	0	3	0	3	5	0	222	6	37	37			[Al3(OH)3(OH2)5]6+				[Al3(OH)3(OH2)5]	[Al(OH)4]
6	0	0	6	0	1	25	0	629	17	37	37			[Al6(OH)(OH2)25]17+				[Al6(OH)(OH2)25]	[Al(OH)4]
6	1	0	6	0	2	22	0	592	16	37	37							[Al6(OH)2(OH2)22]	[Al(OH)4]
4	0	0	6	0	7	7	0	407	11	37	37			[Al6(OH)7(OH2)7]11+				[Al6(OH)7(OH2)7]	[Al(OH)4]
4	0	0	6	2	3	9	0	407	11	37	37			[Al6 O2(OH)3(OH2)9]11+				[Al6 O2(OH)3(OH2)9]	[Al(OH)4]
6	0	0	5	0	1	21	0	530	14	37.8571	37.8571			[Al5(OH)(OH2)21]14+				[Al5(OH)(OH2)21]	[Al(OH)4]
4	0	0	5	0	6	6	0	345	9	38.3333	38.3333			[Al5(OH)6(OH2)6]9+				[Al5(OH)6(OH2)6]	[Al(OH)4]
4	0	0	5	2	2	8	0	345	9	38.3333	38.3333			[Al5 O2(OH)2(OH2)8]9+				[Al5 O2(OH)2(OH2)8]	[Al(OH)4]
6	0	1	3	0	0	13	0	1355	35	38.7143	38.7143			[[Al3(OH2)13]9+ ]4 [Al(OH)4]-	9	315	95	[Al3(OH2)13]	[Al(OH)4]
6	0	0	2	0	0	10	0	234	6	39	39			[Al2(OH2)10]6+				[Al2(OH2)10]	[Al(OH)4]
6	0	0	4	0	1	17	0	431	11	39.1818	39.1818			[Al4(OH)(OH2)17]11+				[Al4(OH)(OH2)17]	[Al(OH)4]
6	0	0	6	0	2	24	0	628	16	39.25	39.25			[Al6(OH)2(OH2)24]16+				[Al6(OH)2(OH2)24]	[Al(OH)4]
4	0	0	2	0	2	4	0	160	4	40	40			[Al2(OH)2(OH2)4]4+				[Al2(OH)2(OH2)4]	[Al(OH)4]
4	0	0	4	0	5	5	0	283	7	40.4286	40.4286			[Al4(OH)5(OH2)5]7+				[Al4(OH)5(OH2)5]	[Al(OH)4]
4	0	0	4	2	1	7	0	283	7	40.4286	40.4286			[Al4 O2(OH)(OH2)7]7+				[Al4 O2(OH)(OH2)7]	[Al(OH)4]
4	0	0	6	0	8	6	0	406	10	40.6	40.6			[Al6(OH)8(OH2)6]10+				[Al6(OH)8(OH2)6]	[Al(OH)4]
4	0	0	6	2	4	8	0	406	10	40.6	40.6			[Al6 O2(OH)4(OH2)8]10+				[Al6 O2(OH)4(OH2)8]	[Al(OH)4]
4	0	0	6	4	0	10	0	406	10	40.6	40.6			[Al6 O4(OH2)10]10+				[Al6 O4(OH2)10]	[Al(OH)4]
6	0	0	5	0	2	20	0	529	13	40.6923	40.6923			[Al5(OH)2(OH2)20]13+				[Al5(OH)2(OH2)20]	[Al(OH)4]
6	0	0	3	0	1	13	0	332	8	41.5	41.5			[Al3(OH)(OH2)13]8+				[Al3(OH)(OH2)13]	[Al(OH)4]
6	0	0	6	0	3	23	0	627	15	41.8	41.8			[Al6(OH)3(OH2)23]15+				[Al6(OH)3(OH2)23]	[Al(OH)4]
6	1	0	6	0	4	20	0	590	14	42.1429	42.1429							[Al6(OH)4(OH2)20]	[Al(OH)4]
6	1	0	6	2	0	22	0	590	14	42.1429	42.1429							[Al6 O2(OH2)22]	[Al(OH)4]
6	0	0	4	0	2	16	0	430	10	43	43			[Al4(OH)2(OH2)16]10+				[Al4(OH)2(OH2)16]	[Al(OH)4]
4	0	0	5	0	7	5	0	344	8	43	43			[Al5(OH)7(OH2)5]8+				[Al5(OH)7(OH2)5]	[Al(OH)4]
4	0	0	5	2	3	7	0	344	8	43	43			[Al5 O2(OH)3(OH2)7]8+				[Al5 O2(OH)3(OH2)7]	[Al(OH)4]
6	0	1	3	0	0	13	4	1351	31	43.5806	43.5806			[[Al3(OH2)13]9+ ]4 [AlO4]5-	9	315	91	[Al3(OH2)13]	[AlO4]
6	0	1	3	0	1	12	0	1351	31	43.5806	43.5806			[[Al3(OH)(OH2)12]8+ ]4 [Al(OH)4]-	8	314	95	[Al3(OH)(OH2)12]	[Al(OH)4]
6	0	0	5	0	3	19	0	528	12	44	44			[Al5(OH)3(OH2)19]12+				[Al5(OH)3(OH2)19]	[Al(OH)4]
4	0	0	3	0	4	4	0	221	5	44.2	44.2			[Al3(OH)4(OH2)4]5+				[Al3(OH)4(OH2)4]	[Al(OH)4]
4	0	0	3	2	0	6	0	221	5	44.2	44.2			[Al3 O2(OH2)6]5+				[Al3 O2(OH2)6]	[Al(OH)4]
6	0	0	6	0	4	22	0	626	14	44.7143	44.7143			[Al6(OH)4(OH2)22]14+				[Al6(OH)4(OH2)22]	[Al(OH)4]
6	0	0	6	2	0	24	0	626	14	44.7143	44.7143			[Al6 O2(OH2)24]14+				[Al6 O2(OH2)24]	[Al(OH)4]
6	0	0	1	0	0	6	0	135	3	45	45			[Al(OH2)6]3+				[Al(OH2)6]	[Al(OH)4]
4	0	0	6	0	9	5	0	405	9	45	45			[Al6(OH)9(OH2)5]9+				[Al6(OH)9(OH2)5]	[Al(OH)4]
4	0	0	6	2	5	7	0	405	9	45	45			[Al6 O2(OH)5(OH2)7]9+				[Al6 O2(OH)5(OH2)7]	[Al(OH)4]
4	0	0	6	4	1	9	0	405	9	45	45			[Al6 O4(OH)(OH2)9]9+				[Al6 O4(OH)(OH2)9]	[Al(OH)4]
6	0	0	2	0	1	9	0	233	5	46.6	46.6			[Al2(OH)(OH2)9]5+				[Al2(OH)(OH2)9]	[Al(OH)4]
4	0	0	4	0	6	4	0	282	6	47	47			[Al4(OH)6(OH2)4]6+				[Al4(OH)6(OH2)4]	[Al(OH)4]
4	0	0	4	2	2	6	0	282	6	47	47			[Al4 O2(OH)2(OH2)6]6+				[Al4 O2(OH)2(OH2)6]	[Al(OH)4]
6	0	0	3	0	2	12	0	331	7	47.2857	47.2857			[Al3(OH)2(OH2)12]7+				[Al3(OH)2(OH2)12]	[Al(OH)4]
6	0	0	4	0	3	15	0	429	9	47.6667	47.6667			[Al4(OH)3(OH2)15]9+				[Al4(OH)3(OH2)15]	[Al(OH)4]
6	0	0	5	0	4	18	0	527	11	47.9091	47.9091			[Al5(OH)4(OH2)18]11+				[Al5(OH)4(OH2)18]	[Al(OH)4]
6	0	0	5	2	0	20	0	527	11	47.9091	47.9091			[Al5 O2(OH2)20]11+				[Al5 O2(OH2)20]	[Al(OH)4]
6	0	0	6	0	5	21	0	625	13	48.0769	48.0769			[Al6(OH)5(OH2)21]13+				[Al6(OH)5(OH2)21]	[Al(OH)4]
6	0	0	6	2	1	23	0	625	13	48.0769	48.0769			[Al6 O2(OH)(OH2)23]13+				[Al6 O2(OH)(OH2)23]	[Al(OH)4]
4	0	0	1	0	1	3	0	98	2	49	49			[Al(OH)(OH2)3]2+				[Al(OH)(OH2)3]	[Al(OH)4]
4	0	0	5	0	8	4	0	343	7	49	49			[Al5(OH)8(OH2)4]7+				[Al5(OH)8(OH2)4]	[Al(OH)4]
4	0	0	5	2	4	6	0	343	7	49	49			[Al5 O2(OH)4(OH2)6]7+				[Al5 O2(OH)4(OH2)6]	[Al(OH)4]
4	0	0	5	4	0	8	0	343	7	49	49			[Al5 O4(OH2)8]7+				[Al5 O4(OH2)8]	[Al(OH)4]
6	1	0	6	0	6	18	0	588	12	49	49							[Al6(OH)6(OH2)18]	[Al(OH)4]
6	1	0	6	2	2	20	0	588	12	49	49							[Al6 O2(OH)2(OH2)20]	[Al(OH)4]
6	0	1	3	0	1	12	4	1347	27	49.8889	49.8889			[[Al3(OH)(OH2)12]8+ ]4 [AlO4]5-	8	314	91	[Al3(OH)(OH2)12]	[AlO4]
6	0	1	3	0	2	11	0	1347	27	49.8889	49.8889			[[Al3(OH)2(OH2)11]7+ ]4 [Al(OH)4]-	7	313	95	[Al3(OH)2(OH2)11]	[Al(OH)4]
6	0	1	3	1	0	12	0	1347	27	49.8889	49.8889			[[Al3 O(OH2)12]7+ ]4 [Al(OH)4]-	7	313	95	[Al3 O(OH2)12]	[Al(OH)4]
4	0	0	6	0	10	4	0	404	8	50.5	50.5			[Al6(OH)10(OH2)4]8+				[Al6(OH)10(OH2)4]	[Al(OH)4]
4	0	0	6	2	6	6	0	404	8	50.5	50.5			[Al6 O2(OH)6(OH2)6]8+				[Al6 O2(OH)6(OH2)6]	[Al(OH)4]
4	0	0	6	4	2	8	0	404	8	50.5	50.5			[Al6 O4(OH)2(OH2)8]8+				[Al6 O4(OH)2(OH2)8]	[Al(OH)4]
6	0	0	6	0	6	20	0	624	12	52	52			[Al6(OH)6(OH2)20]12+				[Al6(OH)6(OH2)20]	[Al(OH)4]
6	0	0	6	2	2	22	0	624	12	52	52			[Al6 O2(OH)2(OH2)22]12+				[Al6 O2(OH)2(OH2)22]	[Al(OH)4]
6	0	0	5	0	5	17	0	526	10	52.6	52.6			[Al5(OH)5(OH2)17]10+				[Al5(OH)5(OH2)17]	[Al(OH)4]
6	0	0	5	2	1	19	0	526	10	52.6	52.6			[Al5 O2(OH)(OH2)19]10+				[Al5 O2(OH)(OH2)19]	[Al(OH)4]
4	0	0	2	0	3	3	0	159	3	53	53			[Al2(OH)3(OH2)3]3+				[Al2(OH)3(OH2)3]	[Al(OH)4]
6	0	0	4	0	4	14	0	428	8	53.5	53.5			[Al4(OH)4(OH2)14]8+				[Al4(OH)4(OH2)14]	[Al(OH)4]
6	0	0	3	0	3	11	0	330	6	55	55			[Al3(OH)3(OH2)11]6+				[Al3(OH)3(OH2)11]	[Al(OH)4]
4	0	0	3	0	5	3	0	220	4	55	55			[Al3(OH)5(OH2)3]4+				[Al3(OH)5(OH2)3]	[Al(OH)4]
4	0	0	3	2	1	5	0	220	4	55	55			[Al3 O2(OH)(OH2)5]4+				[Al3 O2(OH)(OH2)5]	[Al(OH)4]
4	0	0	4	0	7	3	0	281	5	56.2	56.2			[Al4(OH)7(OH2)3]5+				[Al4(OH)7(OH2)3]	[Al(OH)4]
4	0	0	4	2	3	5	0	281	5	56.2	56.2			[Al4 O2(OH)3(OH2)5]5+				[Al4 O2(OH)3(OH2)5]	[Al(OH)4]
6	0	0	6	0	7	19	0	623	11	56.6364	56.6364			[Al6(OH)7(OH2)19]11+				[Al6(OH)7(OH2)19]	[Al(OH)4]
6	0	0	6	2	3	21	0	623	11	56.6364	56.6364			[Al6 O2(OH)3(OH2)21]11+				[Al6 O2(OH)3(OH2)21]	[Al(OH)4]
4	0	0	5	0	9	3	0	342	6	57	57			[Al5(OH)9(OH2)3]6+				[Al5(OH)9(OH2)3]	[Al(OH)4]
4	0	0	5	2	5	5	0	342	6	57	57			[Al5 O2(OH)5(OH2)5]6+				[Al5 O2(OH)5(OH2)5]	[Al(OH)4]
4	0	0	5	4	1	7	0	342	6	57	57			[Al5 O4(OH)(OH2)7]6+				[Al5 O4(OH)(OH2)7]	[Al(OH)4]
4	0	0	6	0	11	3	0	403	7	57.5714	57.5714			[Al6(OH)11(OH2)3]7+				[Al6(OH)11(OH2)3]	[Al(OH)4]
4	0	0	6	2	7	5	0	403	7	57.5714	57.5714			[Al6 O2(OH)7(OH2)5]7+				[Al6 O2(OH)7(OH2)5]	[Al(OH)4]
4	0	0	6	4	3	7	0	403	7	57.5714	57.5714			[Al6 O4(OH)3(OH2)7]7+				[Al6 O4(OH)3(OH2)7]	[Al(OH)4]
6	0	0	2	0	2	8	0	232	4	58	58			[Al2(OH)2(OH2)8]4+				[Al2(OH)2(OH2)8]	[Al(OH)4]
6	0	0	5	0	6	16	0	525	9	58.3333	58.3333			[Al5(OH)6(OH2)16]9+				[Al5(OH)6(OH2)16]	[Al(OH)4]
6	0	0	5	2	2	18	0	525	9	58.3333	58.3333			[Al5 O2(OH)2(OH2)18]9+				[Al5 O2(OH)2(OH2)18]	[Al(OH)4]
6	0	1	3	0	2	11	4	1343	23	58.3913	58.3913			[[Al3(OH)2(OH2)11]7+ ]4 [AlO4]5-	7	313	91	[Al3(OH)2(OH2)11]	[AlO4]
6	0	1	3	0	3	10	0	1343	23	58.3913	58.3913			[[Al3(OH)3(OH2)10]6+ ]4 [Al(OH)4]-	6	312	95	[Al3(OH)3(OH2)10]	[Al(OH)4]
6	0	1	3	1	0	12	4	1343	23	58.3913	58.3913			[[Al3 O(OH2)12]7+ ]4 [AlO4]5-	7	313	91	[Al3 O(OH2)12]	[AlO4]
6	0	1	3	1	1	11	0	1343	23	58.3913	58.3913			[[Al3 O(OH)(OH2)11]6+ ]4 [Al(OH)4]-	6	312	95	[Al3 O(OH)(OH2)11]	[Al(OH)4]
6	1	0	6	0	8	16	0	586	10	58.6	58.6							[Al6(OH)8(OH2)16]	[Al(OH)4]
6	1	0	6	2	4	18	0	586	10	58.6	58.6							[Al6 O2(OH)4(OH2)18]	[Al(OH)4]
6	1	0	6	4	0	20	0	586	10	58.6	58.6							[Al6 O4(OH2)20]	[Al(OH)4]
6	0	0	4	0	5	13	0	427	7	61	61			[Al4(OH)5(OH2)13]7+				[Al4(OH)5(OH2)13]	[Al(OH)4]
6	0	0	6	0	8	18	0	622	10	62.2	62.2			[Al6(OH)8(OH2)18]10+				[Al6(OH)8(OH2)18]	[Al(OH)4]
6	0	0	6	2	4	20	0	622	10	62.2	62.2			[Al6 O2(OH)4(OH2)20]10+				[Al6 O2(OH)4(OH2)20]	[Al(OH)4]
6	0	0	6	4	0	22	0	622	10	62.2	62.2			[Al6 O4(OH2)22]10+				[Al6 O4(OH2)22]	[Al(OH)4]
6	0	0	5	0	7	15	0	524	8	65.5	65.5			[Al5(OH)7(OH2)15]8+				[Al5(OH)7(OH2)15]	[Al(OH)4]
6	0	0	5	2	3	17	0	524	8	65.5	65.5			[Al5 O2(OH)3(OH2)17]8+				[Al5 O2(OH)3(OH2)17]	[Al(OH)4]
6	0	0	3	0	4	10	0	329	5	65.8	65.8			[Al3(OH)4(OH2)10]5+				[Al3(OH)4(OH2)10]	[Al(OH)4]
6	0	0	3	2	0	12	0	329	5	65.8	65.8			[Al3 O2(OH2)12]5+				[Al3 O2(OH2)12]	[Al(OH)4]
6	0	0	1	0	1	5	0	134	2	67	67			[Al(OH)(OH2)5]2+				[Al(OH)(OH2)5]	[Al(OH)4]
4	0	0	6	0	12	2	0	402	6	67	67			[Al6(OH)12(OH2)2]6+				[Al6(OH)12(OH2)2]	[Al(OH)4]
4	0	0	6	2	8	4	0	402	6	67	67			[Al6 O2(OH)8(OH2)4]6+				[Al6 O2(OH)8(OH2)4]	[Al(OH)4]
4	0	0	6	4	4	6	0	402	6	67	67			[Al6 O4(OH)4(OH2)6]6+				[Al6 O4(OH)4(OH2)6]	[Al(OH)4]
4	0	0	6	6	0	8	0	402	6	67	67			[Al6 O6(OH2)8]6+				[Al6 O6(OH2)8]	[Al(OH)4]
4	0	0	5	0	10	2	0	341	5	68.2	68.2			[Al5(OH)10(OH2)2]5+				[Al5(OH)10(OH2)2]	[Al(OH)4]
4	0	0	5	2	6	4	0	341	5	68.2	68.2			[Al5 O2(OH)6(OH2)4]5+				[Al5 O2(OH)6(OH2)4]	[Al(OH)4]
4	0	0	5	4	2	6	0	341	5	68.2	68.2			[Al5 O4(OH)2(OH2)6]5+				[Al5 O4(OH)2(OH2)6]	[Al(OH)4]
6	0	0	6	0	9	17	0	621	9	69	69			[Al6(OH)9(OH2)17]9+				[Al6(OH)9(OH2)17]	[Al(OH)4]
6	0	0	6	2	5	19	0	621	9	69	69			[Al6 O2(OH)5(OH2)19]9+				[Al6 O2(OH)5(OH2)19]	[Al(OH)4]
6	0	0	6	4	1	21	0	621	9	69	69			[Al6 O4(OH)(OH2)21]9+				[Al6 O4(OH)(OH2)21]	[Al(OH)4]
4	0	0	4	0	8	2	0	280	4	70	70			[Al4(OH)8(OH2)2]4+				[Al4(OH)8(OH2)2]	[Al(OH)4]
4	0	0	4	2	4	4	0	280	4	70	70			[Al4 O2(OH)4(OH2)4]4+				[Al4 O2(OH)4(OH2)4]	[Al(OH)4]
4	0	0	4	4	0	6	0	280	4	70	70			[Al4 O4(OH2)6]4+				[Al4 O4(OH2)6]	[Al(OH)4]
6	0	1	3	0	3	10	4	1339	19	70.4737	70.4737			[[Al3(OH)3(OH2)10]6+ ]4 [AlO4]5-	6	312	91	[Al3(OH)3(OH2)10]	[AlO4]
6	0	1	3	0	4	9	0	1339	19	70.4737	70.4737			[[Al3(OH)4(OH2)9]5+ ]4 [Al(OH)4]-	5	311	95	[Al3(OH)4(OH2)9]	[Al(OH)4]
6	0	1	3	1	1	11	4	1339	19	70.4737	70.4737			[[Al3 O(OH)(OH2)11]6+ ]4 [AlO4]5-	6	312	91	[Al3 O(OH)(OH2)11]	[AlO4]
6	0	1	3	1	2	10	0	1339	19	70.4737	70.4737			[[Al3 O(OH)2(OH2)10]5+ ]4 [Al(OH)4]-	5	311	95	[Al3 O(OH)2(OH2)10]	[Al(OH)4]
6	0	1	3	2	0	11	0	1339	19	70.4737	70.4737			[[Al3 O2(OH2)11]5+ ]4 [Al(OH)4]-	5	311	95	[Al3 O2(OH2)11]	[Al(OH)4]
6	0	0	4	0	6	12	0	426	6	71	71			[Al4(OH)6(OH2)12]6+				[Al4(OH)6(OH2)12]	[Al(OH)4]
4	0	0	3	0	6	2	0	219	3	73	73			[Al3(OH)6(OH2)2]3+				[Al3(OH)6(OH2)2]	[Al(OH)4]
4	0	0	3	2	2	4	0	219	3	73	73			[Al3 O2(OH)2(OH2)4]3+				[Al3 O2(OH)2(OH2)4]	[Al(OH)4]
6	1	0	6	0	10	14	0	584	8	73	73							[Al6(OH)10(OH2)14]	[Al(OH)4]
6	1	0	6	2	6	16	0	584	8	73	73							[Al6 O2(OH)6(OH2)16]	[Al(OH)4]
6	1	0	6	4	2	18	0	584	8	73	73							[Al6 O4(OH)2(OH2)18]	[Al(OH)4]
6	0	0	5	0	8	14	0	523	7	74.7143	74.7143			[Al5(OH)8(OH2)14]7+				[Al5(OH)8(OH2)14]	[Al(OH)4]
6	0	0	5	2	4	16	0	523	7	74.7143	74.7143			[Al5 O2(OH)4(OH2)16]7+				[Al5 O2(OH)4(OH2)16]	[Al(OH)4]
6	0	0	5	4	0	18	0	523	7	74.7143	74.7143			[Al5 O4(OH2)18]7+				[Al5 O4(OH2)18]	[Al(OH)4]
6	0	0	2	0	3	7	0	231	3	77	77			[Al2(OH)3(OH2)7]3+				[Al2(OH)3(OH2)7]	[Al(OH)4]
6	0	0	6	0	10	16	0	620	8	77.5	77.5			[Al6(OH)10(OH2)16]8+				[Al6(OH)10(OH2)16]	[Al(OH)4]
6	0	0	6	2	6	18	0	620	8	77.5	77.5			[Al6 O2(OH)6(OH2)18]8+				[Al6 O2(OH)6(OH2)18]	[Al(OH)4]
6	0	0	6	4	2	20	0	620	8	77.5	77.5			[Al6 O4(OH)2(OH2)20]8+				[Al6 O4(OH)2(OH2)20]	[Al(OH)4]
4	0	0	2	0	4	2	0	158	2	79	79	weak	[Al2(OH)4(OH2)2]2+	[Al2(OH)4(OH2)2]2+				[Al2(OH)4(OH2)2]	[Al(OH)4]
4	0	0	2	2	0	4	0	158	2	79	79	weak	[Al2 O2(OH2)4]2+	[Al2 O2(OH2)4]2+				[Al2 O2(OH2)4]	[Al(OH)4]
4	0	0	6	0	13	1	0	401	5	80.2	80.2			[Al6(OH)13(OH2)]5+				[Al6(OH)13(OH2)]	[Al(OH)4]
4	0	0	6	2	9	3	0	401	5	80.2	80.2			[Al6 O2(OH)9(OH2)3]5+				[Al6 O2(OH)9(OH2)3]	[Al(OH)4]
4	0	0	6	4	5	5	0	401	5	80.2	80.2			[Al6 O4(OH)5(OH2)5]5+				[Al6 O4(OH)5(OH2)5]	[Al(OH)4]
4	0	0	6	6	1	7	0	401	5	80.2	80.2			[Al6 O6(OH)(OH2)7]5+				[Al6 O6(OH)(OH2)7]	[Al(OH)4]
6	0	0	3	0	5	9	0	328	4	82	82			[Al3(OH)5(OH2)9]4+				[Al3(OH)5(OH2)9]	[Al(OH)4]
6	0	0	3	2	1	11	0	328	4	82	82			[Al3 O2(OH)(OH2)11]4+				[Al3 O2(OH)(OH2)11]	[Al(OH)4]
6	0	0	4	0	7	11	0	425	5	85	85			[Al4(OH)7(OH2)11]5+				[Al4(OH)7(OH2)11]	[Al(OH)4]
4	0	0	5	0	11	1	0	340	4	85	85			[Al5(OH)11(OH2)]4+				[Al5(OH)11(OH2)]	[Al(OH)4]
4	0	0	5	2	7	3	0	340	4	85	85			[Al5 O2(OH)7(OH2)3]4+				[Al5 O2(OH)7(OH2)3]	[Al(OH)4]
4	0	0	5	4	3	5	0	340	4	85	85			[Al5 O4(OH)3(OH2)5]4+				[Al5 O4(OH)3(OH2)5]	[Al(OH)4]
6	0	0	5	0	9	13	0	522	6	87	87			[Al5(OH)9(OH2)13]6+				[Al5(OH)9(OH2)13]	[Al(OH)4]
6	0	0	5	2	5	15	0	522	6	87	87			[Al5 O2(OH)5(OH2)15]6+				[Al5 O2(OH)5(OH2)15]	[Al(OH)4]
6	0	0	5	4	1	17	0	522	6	87	87			[Al5 O4(OH)(OH2)17]6+				[Al5 O4(OH)(OH2)17]	[Al(OH)4]
6	0	0	6	0	11	15	0	619	7	88.4286	88.4286			[Al6(OH)11(OH2)15]7+				[Al6(OH)11(OH2)15]	[Al(OH)4]
6	0	0	6	2	7	17	0	619	7	88.4286	88.4286			[Al6 O2(OH)7(OH2)17]7+				[Al6 O2(OH)7(OH2)17]	[Al(OH)4]
6	0	0	6	4	3	19	0	619	7	88.4286	88.4286			[Al6 O4(OH)3(OH2)19]7+				[Al6 O4(OH)3(OH2)19]	[Al(OH)4]
6	0	1	3	0	4	9	4	1335	15	89	89			[[Al3(OH)4(OH2)9]5+ ]4 [AlO4]5-	5	311	91	[Al3(OH)4(OH2)9]	[AlO4]
6	0	1	3	0	5	8	0	1335	15	89	89			[[Al3(OH)5(OH2)8]4+ ]4 [Al(OH)4]-	4	310	95	[Al3(OH)5(OH2)8]	[Al(OH)4]
6	0	1	3	1	2	10	4	1335	15	89	89			[[Al3 O(OH)2(OH2)10]5+ ]4 [AlO4]5-	5	311	91	[Al3 O(OH)2(OH2)10]	[AlO4]
6	0	1	3	1	3	9	0	1335	15	89	89			[[Al3 O(OH)3(OH2)9]4+ ]4 [Al(OH)4]-	4	310	95	[Al3 O(OH)3(OH2)9]	[Al(OH)4]
6	0	1	3	2	0	11	4	1335	15	89	89			[[Al3 O2(OH2)11]5+ ]4 [AlO4]5-	5	311	91	[Al3 O2(OH2)11]	[AlO4]
6	0	1	3	2	1	10	0	1335	15	89	89			[[Al3 O2(OH)(OH2)10]4+ ]4 [Al(OH)4]-	4	310	95	[Al3 O2(OH)(OH2)10]	[Al(OH)4]
4	0	0	4	0	9	1	0	279	3	93	93			[Al4(OH)9(OH2)]3+				[Al4(OH)9(OH2)]	[Al(OH)4]
4	0	0	4	2	5	3	0	279	3	93	93			[Al4 O2(OH)5(OH2)3]3+				[Al4 O2(OH)5(OH2)3]	[Al(OH)4]
4	0	0	4	4	1	5	0	279	3	93	93			[Al4 O4(OH)(OH2)5]3+				[Al4 O4(OH)(OH2)5]	[Al(OH)4]
4	0	0	1	0	2	2	0	97	1	97	97	predominant	[Al(OH)2(OH2)2]+	[Al(OH)2(OH2)2]+				[Al(OH)2(OH2)2]	[Al(OH)4]
6	1	0	6	0	12	12	0	582	6	97	97	predominant	[Al6(OH)12(OH2)12]6+					[Al6(OH)12(OH2)12]	[Al(OH)4]	[Al6(OH)12(OH2)12]6+
6	1	0	6	2	8	14	0	582	6	97	97	predominant	[Al6 O2(OH)8(OH2)14]6+					[Al6 O2(OH)8(OH2)14]	[Al(OH)4]	[Al6 O2(OH)8(OH2)14]6+
6	1	0	6	4	4	16	0	582	6	97	97	predominant	[Al6 O4(OH)4(OH2)16]6+					[Al6 O4(OH)4(OH2)16]	[Al(OH)4]	[Al6 O4(OH)4(OH2)16]6+
6	1	0	6	6	0	18	0	582	6	97	97	predominant	[Al6 O6(OH2)18]6+					[Al6 O6(OH2)18]	[Al(OH)4]	[Al6 O6(OH2)18]6+
4	0	0	6	0	14	0	0	400	4	100	100			[Al6(OH)14]4+				[Al6(OH)14]	[Al(OH)4]
4	0	0	6	2	10	2	0	400	4	100	100			[Al6 O2(OH)10(OH2)2]4+				[Al6 O2(OH)10(OH2)2]	[Al(OH)4]
4	0	0	6	4	6	4	0	400	4	100	100			[Al6 O4(OH)6(OH2)4]4+				[Al6 O4(OH)6(OH2)4]	[Al(OH)4]
4	0	0	6	6	2	6	0	400	4	100	100			[Al6 O6(OH)2(OH2)6]4+				[Al6 O6(OH)2(OH2)6]	[Al(OH)4]
6	0	0	6	0	12	14	0	618	6	103	103			[Al6(OH)12(OH2)14]6+				[Al6(OH)12(OH2)14]	[Al(OH)4]
6	0	0	6	2	8	16	0	618	6	103	103			[Al6 O2(OH)8(OH2)16]6+				[Al6 O2(OH)8(OH2)16]	[Al(OH)4]
6	0	0	6	4	4	18	0	618	6	103	103			[Al6 O4(OH)4(OH2)18]6+				[Al6 O4(OH)4(OH2)18]	[Al(OH)4]
6	0	0	6	6	0	20	0	618	6	103	103			[Al6 O6(OH2)20]6+				[Al6 O6(OH2)20]	[Al(OH)4]
6	0	0	5	0	10	12	0	521	5	104.2	104.2			[Al5(OH)10(OH2)12]5+				[Al5(OH)10(OH2)12]	[Al(OH)4]
6	0	0	5	2	6	14	0	521	5	104.2	104.2			[Al5 O2(OH)6(OH2)14]5+				[Al5 O2(OH)6(OH2)14]	[Al(OH)4]
6	0	0	5	4	2	16	0	521	5	104.2	104.2			[Al5 O4(OH)2(OH2)16]5+				[Al5 O4(OH)2(OH2)16]	[Al(OH)4]
6	0	0	4	0	8	10	0	424	4	106	106			[Al4(OH)8(OH2)10]4+				[Al4(OH)8(OH2)10]	[Al(OH)4]
6	0	0	3	0	6	8	0	327	3	109	109			[Al3(OH)6(OH2)8]3+				[Al3(OH)6(OH2)8]	[Al(OH)4]
4	0	0	3	0	7	1	0	218	2	109	109			[Al3(OH)7(OH2)]2+				[Al3(OH)7(OH2)]	[Al(OH)4]
6	0	0	3	2	2	10	0	327	3	109	109			[Al3 O2(OH)2(OH2)10]3+				[Al3 O2(OH)2(OH2)10]	[Al(OH)4]
4	0	0	3	2	3	3	0	218	2	109	109			[Al3 O2(OH)3(OH2)3]2+				[Al3 O2(OH)3(OH2)3]	[Al(OH)4]
4	0	0	5	0	12	0	0	339	3	113	113			[Al5(OH)12]3+				[Al5(OH)12]	[Al(OH)4]
4	0	0	5	2	8	2	0	339	3	113	113			[Al5 O2(OH)8(OH2)2]3+				[Al5 O2(OH)8(OH2)2]	[Al(OH)4]
4	0	0	5	4	4	4	0	339	3	113	113			[Al5 O4(OH)4(OH2)4]3+				[Al5 O4(OH)4(OH2)4]	[Al(OH)4]
4	0	0	5	6	0	6	0	339	3	113	113			[Al5 O6(OH2)6]3+				[Al5 O6(OH2)6]	[Al(OH)4]
6	0	0	2	0	4	6	0	230	2	115	115	strong	[Al2(OH)4(OH2)6]2+	[Al2(OH)4(OH2)6]2+				[Al2(OH)4(OH2)6]	[Al(OH)4]
6	0	0	2	2	0	8	0	230	2	115	115	strong	[Al2 O2(OH2)8]2+	[Al2 O2(OH2)8]2+				[Al2 O2(OH2)8]	[Al(OH)4]
6	0	1	3	0	5	8	4	1331	11	121	121			[[Al3(OH)5(OH2)8]4+ ]4 [AlO4]5-	4	310	91	[Al3(OH)5(OH2)8]	[AlO4]
6	0	1	3	0	6	7	0	1331	11	121	121			[[Al3(OH)6(OH2)7]3+ ]4 [Al(OH)4]-	3	309	95	[Al3(OH)6(OH2)7]	[Al(OH)4]
6	0	1	3	1	3	9	4	1331	11	121	121			[[Al3 O(OH)3(OH2)9]4+ ]4 [AlO4]5-	4	310	91	[Al3 O(OH)3(OH2)9]	[AlO4]
6	0	1	3	1	4	8	0	1331	11	121	121			[[Al3 O(OH)4(OH2)8]3+ ]4 [Al(OH)4]-	3	309	95	[Al3 O(OH)4(OH2)8]	[Al(OH)4]
6	0	1	3	2	1	10	4	1331	11	121	121			[[Al3 O2(OH)(OH2)10]4+ ]4 [AlO4]5-	4	310	91	[Al3 O2(OH)(OH2)10]	[AlO4]
6	0	1	3	2	2	9	0	1331	11	121	121			[[Al3 O2(OH)2(OH2)9]3+ ]4 [Al(OH)4]-	3	309	95	[Al3 O2(OH)2(OH2)9]	[Al(OH)4]
6	0	1	3	3	0	10	0	1331	11	121	121			[[Al3 O3(OH2)10]3+ ]4 [Al(OH)4]-	3	309	95	[Al3 O3(OH2)10]	[Al(OH)4]
6	0	0	6	0	13	13	0	617	5	123.4	123.4			[Al6(OH)13(OH2)13]5+				[Al6(OH)13(OH2)13]	[Al(OH)4]
6	0	0	6	2	9	15	0	617	5	123.4	123.4			[Al6 O2(OH)9(OH2)15]5+				[Al6 O2(OH)9(OH2)15]	[Al(OH)4]
6	0	0	6	4	5	17	0	617	5	123.4	123.4			[Al6 O4(OH)5(OH2)17]5+				[Al6 O4(OH)5(OH2)17]	[Al(OH)4]
6	0	0	6	6	1	19	0	617	5	123.4	123.4			[Al6 O6(OH)(OH2)19]5+				[Al6 O6(OH)(OH2)19]	[Al(OH)4]
6	0	0	5	0	11	11	0	520	4	130	130			[Al5(OH)11(OH2)11]4+				[Al5(OH)11(OH2)11]	[Al(OH)4]
6	0	0	5	2	7	13	0	520	4	130	130			[Al5 O2(OH)7(OH2)13]4+				[Al5 O2(OH)7(OH2)13]	[Al(OH)4]
6	0	0	5	4	3	15	0	520	4	130	130			[Al5 O4(OH)3(OH2)15]4+				[Al5 O4(OH)3(OH2)15]	[Al(OH)4]
6	0	0	1	0	2	4	0	133	1	133	133	weak	[Al(OH)2(OH2)4]+	[Al(OH)2(OH2)4]+				[Al(OH)2(OH2)4]	[Al(OH)4]
4	0	0	6	2	11	1	0	399	3	133	133	weak	[Al6 O2(OH)11(OH2)]3+	[Al6 O2(OH)11(OH2)]3+				[Al6 O2(OH)11(OH2)]	[Al(OH)4]
4	0	0	6	4	7	3	0	399	3	133	133	weak	[Al6 O4(OH)7(OH2)3]3+	[Al6 O4(OH)7(OH2)3]3+				[Al6 O4(OH)7(OH2)3]	[Al(OH)4]
4	0	0	6	6	3	5	0	399	3	133	133	weak	[Al6 O6(OH)3(OH2)5]3+	[Al6 O6(OH)3(OH2)5]3+				[Al6 O6(OH)3(OH2)5]	[Al(OH)4]
4	0	0	4	0	10	0	0	278	2	139	139			[Al4(OH)10]2+				[Al4(OH)10]	[Al(OH)4]
4	0	0	4	2	6	2	0	278	2	139	139			[Al4 O2(OH)6(OH2)2]2+				[Al4 O2(OH)6(OH2)2]	[Al(OH)4]
4	0	0	4	4	2	4	0	278	2	139	139			[Al4 O4(OH)2(OH2)4]2+				[Al4 O4(OH)2(OH2)4]	[Al(OH)4]
6	0	0	4	0	9	9	0	423	3	141	141			[Al4(OH)9(OH2)9]3+				[Al4(OH)9(OH2)9]	[Al(OH)4]
6	1	0	6	2	10	12	0	580	4	145	145							[Al6 O2(OH)10(OH2)12]	[Al(OH)4]
6	1	0	6	4	6	14	0	580	4	145	145							[Al6 O4(OH)6(OH2)14]	[Al(OH)4]
6	1	0	6	6	2	16	0	580	4	145	145							[Al6 O6(OH)2(OH2)16]	[Al(OH)4]
6	0	0	6	0	14	12	0	616	4	154	154	(?) v weak	[Al6(OH)14(OH2)12]4+	[Al6(OH)14(OH2)12]4+				[Al6(OH)14(OH2)12]	[Al(OH)4]
6	0	0	6	2	10	14	0	616	4	154	154	(?) v weak	[Al6 O2(OH)10(OH2)14]4+	[Al6 O2(OH)10(OH2)14]4+				[Al6 O2(OH)10(OH2)14]	[Al(OH)4]
6	0	0	6	4	6	16	0	616	4	154	154	(?) v weak	[Al6 O4(OH)6(OH2)16]4+	[Al6 O4(OH)6(OH2)16]4+				[Al6 O4(OH)6(OH2)16]	[Al(OH)4]
6	0	0	6	6	2	18	0	616	4	154	154	(?) v weak	[Al6 O6(OH)2(OH2)18]4+	[Al6 O6(OH)2(OH2)18]4+				[Al6 O6(OH)2(OH2)18]	[Al(OH)4]
4	0	0	2	0	5	1	0	157	1	157	157	weak	[Al2(OH)5(OH2)]+	[Al2(OH)5(OH2)]+				[Al2(OH)5(OH2)]	[Al(OH)4]
4	0	0	2	2	1	3	0	157	1	157	157	weak	[Al2 O2(OH)(OH2)3]+	[Al2 O2(OH)(OH2)3]+				[Al2 O2(OH)(OH2)3]	[Al(OH)4]
6	0	0	3	0	7	7	0	326	2	163	163			[Al3(OH)7(OH2)7]2+				[Al3(OH)7(OH2)7]	[Al(OH)4]
6	0	0	3	2	3	9	0	326	2	163	163			[Al3 O2(OH)3(OH2)9]2+				[Al3 O2(OH)3(OH2)9]	[Al(OH)4]
4	0	0	5	2	9	1	0	338	2	169	169			[Al5 O2(OH)9(OH2)]2+				[Al5 O2(OH)9(OH2)]	[Al(OH)4]
4	0	0	5	4	5	3	0	338	2	169	169			[Al5 O4(OH)5(OH2)3]2+				[Al5 O4(OH)5(OH2)3]	[Al(OH)4]
4	0	0	5	6	1	5	0	338	2	169	169			[Al5 O6(OH)(OH2)5]2+				[Al5 O6(OH)(OH2)5]	[Al(OH)4]
6	0	0	5	0	12	10	0	519	3	173	173	(?) weak	[Al5(OH)12(OH2)10]3+	[Al5(OH)12(OH2)10]3+				[Al5(OH)12(OH2)10]	[Al(OH)4]
6	0	0	5	2	8	12	0	519	3	173	173	(?) weak	[Al5 O2(OH)8(OH2)12]3+	[Al5 O2(OH)8(OH2)12]3+				[Al5 O2(OH)8(OH2)12]	[Al(OH)4]
6	0	0	5	4	4	14	0	519	3	173	173	(?) weak	[Al5 O4(OH)4(OH2)14]3+	[Al5 O4(OH)4(OH2)14]3+				[Al5 O4(OH)4(OH2)14]	[Al(OH)4]
6	0	0	5	6	0	16	0	519	3	173	173	(?) weak	[Al5 O6(OH2)16]3+	[Al5 O6(OH2)16]3+				[Al5 O6(OH2)16]	[Al(OH)4]
6	0	1	3	0	6	7	4	1327	7	189.571	189.571			[[Al3(OH)6(OH2)7]3+ ]4 [AlO4]5-	3	309	91	[Al3(OH)6(OH2)7]	[AlO4]
6	0	1	3	0	7	6	0	1327	7	189.571	189.571			[[Al3(OH)7(OH2)6]2+ ]4 [Al(OH)4]-	2	308	95	[Al3(OH)7(OH2)6]	[Al(OH)4]
6	0	1	3	1	4	8	4	1327	7	189.571	189.571			[[Al3 O(OH)4(OH2)8]3+ ]4 [AlO4]5-	3	309	91	[Al3 O(OH)4(OH2)8]	[AlO4]
6	0	1	3	1	5	7	0	1327	7	189.571	189.571			[[Al3 O(OH)5(OH2)7]2+ ]4 [Al(OH)4]-	2	308	95	[Al3 O(OH)5(OH2)7]	[Al(OH)4]
6	0	1	3	2	2	9	4	1327	7	189.571	189.571			[[Al3 O2(OH)2(OH2)9]3+ ]4 [AlO4]5-	3	309	91	[Al3 O2(OH)2(OH2)9]	[AlO4]
6	0	1	3	2	3	8	0	1327	7	189.571	189.571			[[Al3 O2(OH)3(OH2)8]2+ ]4 [Al(OH)4]-	2	308	95	[Al3 O2(OH)3(OH2)8]	[Al(OH)4]
6	0	1	3	3	0	10	4	1327	7	189.571	189.571			[[Al3 O3(OH2)10]3+ ]4 [AlO4]5-	3	309	91	[Al3 O3(OH2)10]	[AlO4]
6	0	1	3	3	1	9	0	1327	7	189.571	189.571			[[Al3 O3(OH)(OH2)9]2+ ]4 [Al(OH)4]-	2	308	95	[Al3 O3(OH)(OH2)9]	[Al(OH)4]
4	0	0	6	2	12	0	0	398	2	199	199	(?) v weak	[Al6 O2(OH)12]2+	[Al6 O2(OH)12]2+				[Al6 O2(OH)12]	[Al(OH)4]
4	0	0	6	4	8	2	0	398	2	199	199	(?) v weak	[Al6 O4(OH)8(OH2)2]2+	[Al6 O4(OH)8(OH2)2]2+				[Al6 O4(OH)8(OH2)2]	[Al(OH)4]
4	0	0	6	6	4	4	0	398	2	199	199	(?) v weak	[Al6 O6(OH)4(OH2)4]2+	[Al6 O6(OH)4(OH2)4]2+				[Al6 O6(OH)4(OH2)4]	[Al(OH)4]
4	0	0	6	8	0	6	0	398	2	199	199	(?) v weak	[Al6 O8(OH2)6]2+	[Al6 O8(OH2)6]2+				[Al6 O8(OH2)6]	[Al(OH)4]
6	0	0	6	0	15	11	0	615	3	205	205			[Al6(OH)15(OH2)11]3+				[Al6(OH)15(OH2)11]	[Al(OH)4]
6	0	0	6	2	11	13	0	615	3	205	205			[Al6 O2(OH)11(OH2)13]3+				[Al6 O2(OH)11(OH2)13]	[Al(OH)4]
6	0	0	6	4	7	15	0	615	3	205	205			[Al6 O4(OH)7(OH2)15]3+				[Al6 O4(OH)7(OH2)15]	[Al(OH)4]
6	0	0	6	6	3	17	0	615	3	205	205			[Al6 O6(OH)3(OH2)17]3+				[Al6 O6(OH)3(OH2)17]	[Al(OH)4]
4	0	0	3	0	8	0	0	217	1	217	217	weak	[Al3(OH)8]+	[Al3(OH)8]+				[Al3(OH)8]	[Al(OH)4]
4	0	0	3	2	4	2	0	217	1	217	217	weak	[Al3 O2(OH)4(OH2)2]+	[Al3 O2(OH)4(OH2)2]+				[Al3 O2(OH)4(OH2)2]	[Al(OH)4]
4	0	0	3	4	0	4	0	217	1	217	217	weak	[Al3 O4(OH2)4]+	[Al3 O4(OH2)4]+				[Al3 O4(OH2)4]	[Al(OH)4]
6	0	0	2	0	5	5	0	229	1	229	229			[Al2(OH)5(OH2)5]+				[Al2(OH)5(OH2)5]	[Al(OH)4]
6	0	0	2	2	1	7	0	229	1	229	229			[Al2 O2(OH)(OH2)7]+				[Al2 O2(OH)(OH2)7]	[Al(OH)4]
6	0	0	5	0	13	9	0	518	2	259	259			[Al5(OH)13(OH2)9]2+				[Al5(OH)13(OH2)9]	[Al(OH)4]
6	0	0	5	2	9	11	0	518	2	259	259			[Al5 O2(OH)9(OH2)11]2+				[Al5 O2(OH)9(OH2)11]	[Al(OH)4]
6	0	0	5	4	5	13	0	518	2	259	259			[Al5 O4(OH)5(OH2)13]2+				[Al5 O4(OH)5(OH2)13]	[Al(OH)4]
6	0	0	5	6	1	15	0	518	2	259	259			[Al5 O6(OH)(OH2)15]2+				[Al5 O6(OH)(OH2)15]	[Al(OH)4]
4	0	0	4	2	7	1	0	277	1	277	277	v weak	[Al4 O2(OH)7(OH2)]+	[Al4 O2(OH)7(OH2)]+				[Al4 O2(OH)7(OH2)]	[Al(OH)4]
4	0	0	4	4	3	3	0	277	1	277	277	v weak	[Al4 O4(OH)3(OH2)3]+	[Al4 O4(OH)3(OH2)3]+				[Al4 O4(OH)3(OH2)3]	[Al(OH)4]
6	1	0	6	4	8	12	0	578	2	289	289							[Al6 O4(OH)8(OH2)12]	[Al(OH)4]
6	1	0	6	6	4	14	0	578	2	289	289							[Al6 O6(OH)4(OH2)14]	[Al(OH)4]
6	0	0	6	0	16	10	0	614	2	307	307	(?) v weak	[Al6(OH)16(OH2)10]2+	[Al6(OH)16(OH2)10]2+				[Al6(OH)16(OH2)10]	[Al(OH)4]
6	0	0	6	2	12	12	0	614	2	307	307	(?) v weak	[Al6 O2(OH)12(OH2)12]2+	[Al6 O2(OH)12(OH2)12]2+				[Al6 O2(OH)12(OH2)12]	[Al(OH)4]
6	0	0	6	4	8	14	0	614	2	307	307	(?) v weak	[Al6 O4(OH)8(OH2)14]2+	[Al6 O4(OH)8(OH2)14]2+				[Al6 O4(OH)8(OH2)14]	[Al(OH)4]
6	0	0	6	6	4	16	0	614	2	307	307	(?) v weak	[Al6 O6(OH)4(OH2)16]2+	[Al6 O6(OH)4(OH2)16]2+				[Al6 O6(OH)4(OH2)16]	[Al(OH)4]
6	0	0	6	8	0	18	0	614	2	307	307	(?) v weak	[Al6 O8(OH2)18]2+	[Al6 O8(OH2)18]2+				[Al6 O8(OH2)18]	[Al(OH)4]
6	0	0	3	0	8	6	0	325	1	325	325			[Al3(OH)8(OH2)6]+				[Al3(OH)8(OH2)6]	[Al(OH)4]
6	0	0	3	2	4	8	0	325	1	325	325			[Al3 O2(OH)4(OH2)8]+				[Al3 O2(OH)4(OH2)8]	[Al(OH)4]
6	0	0	3	4	0	10	0	325	1	325	325			[Al3 O4(OH2)10]+				[Al3 O4(OH2)10]	[Al(OH)4]
4	0	0	5	2	10	0	0	337	1	337	337	(?) v weak	[Al5 O2(OH)10]+	[Al5 O2(OH)10]+				[Al5 O2(OH)10]	[Al(OH)4]
4	0	0	5	4	6	2	0	337	1	337	337	(?) v weak	[Al5 O4(OH)6(OH2)2]+	[Al5 O4(OH)6(OH2)2]+				[Al5 O4(OH)6(OH2)2]	[Al(OH)4]
4	0	0	5	6	2	4	0	337	1	337	337	(?) v weak	[Al5 O6(OH)2(OH2)4]+	[Al5 O6(OH)2(OH2)4]+				[Al5 O6(OH)2(OH2)4]	[Al(OH)4]
4	0	0	6	4	9	1	0	397	1	397	397			[Al6 O4(OH)9(OH2)]+				[Al6 O4(OH)9(OH2)]	[Al(OH)4]
4	0	0	6	6	5	3	0	397	1	397	397			[Al6 O6(OH)5(OH2)3]+				[Al6 O6(OH)5(OH2)3]	[Al(OH)4]
4	0	0	6	8	1	5	0	397	1	397	397			[Al6 O8(OH)(OH2)5]+				[Al6 O8(OH)(OH2)5]	[Al(OH)4]
6	0	1	3	0	7	6	4	1323	3	441	441			[[Al3(OH)7(OH2)6]2+ ]4 [AlO4]5-	2	308	91	[Al3(OH)7(OH2)6]	[AlO4]
6	0	1	3	0	8	5	0	1323	3	441	441			[[Al3(OH)8(OH2)5]+ ]4 [Al(OH)4]-	1	307	95	[Al3(OH)8(OH2)5]	[Al(OH)4]
6	0	1	3	1	5	7	4	1323	3	441	441			[[Al3 O(OH)5(OH2)7]2+ ]4 [AlO4]5-	2	308	91	[Al3 O(OH)5(OH2)7]	[AlO4]
6	0	1	3	1	6	6	0	1323	3	441	441			[[Al3 O(OH)6(OH2)6]+ ]4 [Al(OH)4]-	1	307	95	[Al3 O(OH)6(OH2)6]	[Al(OH)4]
6	0	1	3	2	3	8	4	1323	3	441	441			[[Al3 O2(OH)3(OH2)8]2+ ]4 [AlO4]5-	2	308	91	[Al3 O2(OH)3(OH2)8]	[AlO4]
6	0	1	3	2	4	7	0	1323	3	441	441			[[Al3 O2(OH)4(OH2)7]+ ]4 [Al(OH)4]-	1	307	95	[Al3 O2(OH)4(OH2)7]	[Al(OH)4]
6	0	1	3	3	1	9	4	1323	3	441	441			[[Al3 O3(OH)(OH2)9]2+ ]4 [AlO4]5-	2	308	91	[Al3 O3(OH)(OH2)9]	[AlO4]
6	0	1	3	3	2	8	0	1323	3	441	441			[[Al3 O3(OH)2(OH2)8]+ ]4 [Al(OH)4]-	1	307	95	[Al3 O3(OH)2(OH2)8]	[Al(OH)4]
6	0	1	3	4	0	9	0	1323	3	441	441			[[Al3 O4(OH2)9]+ ]4 [Al(OH)4]-	1	307	95	[Al3 O4(OH2)9]	[Al(OH)4]
6	0	0	5	0	14	8	0	517	1	517	517			[Al5(OH)14(OH2)8]+				[Al5(OH)14(OH2)8]	[Al(OH)4]
6	0	0	5	2	10	10	0	517	1	517	517			[Al5 O2(OH)10(OH2)10]+				[Al5 O2(OH)10(OH2)10]	[Al(OH)4]
6	0	0	5	4	6	12	0	517	1	517	517			[Al5 O4(OH)6(OH2)12]+				[Al5 O4(OH)6(OH2)12]	[Al(OH)4]
6	0	0	5	6	2	14	0	517	1	517	517			[Al5 O6(OH)2(OH2)14]+				[Al5 O6(OH)2(OH2)14]	[Al(OH)4]
6	0	0	6	0	17	9	0	613	1	613	613			[Al6(OH)17(OH2)9]+				[Al6(OH)17(OH2)9]	[Al(OH)4]
6	0	0	6	2	13	11	0	613	1	613	613			[Al6 O2(OH)13(OH2)11]+				[Al6 O2(OH)13(OH2)11]	[Al(OH)4]
6	0	0	6	4	9	13	0	613	1	613	613			[Al6 O4(OH)9(OH2)13]+				[Al6 O4(OH)9(OH2)13]	[Al(OH)4]
6	0	0	6	6	5	15	0	613	1	613	613			[Al6 O6(OH)5(OH2)15]+				[Al6 O6(OH)5(OH2)15]	[Al(OH)4]
6	0	0	6	8	1	17	0	613	1	613	613			[Al6 O8(OH)(OH2)17]+				[Al6 O8(OH)(OH2)17]	[Al(OH)4]
6	0	1	3	0	8	5	4	1319		no cation				[[Al3(OH)8(OH2)5]+ ]4 [AlO4]5-	1	307	91	[Al3(OH)8(OH2)5]	[AlO4]
6	0	1	3	0	9	4	0	1319		no cation				[[Al3(OH)9(OH2)4] ]4 [Al(OH)4]-	0	306	95	[Al3(OH)9(OH2)4]	[Al(OH)4]
6	0	1	3	4	1	8	0	1319		no cation				[[Al3 O4(OH)(OH2)8] ]4 [Al(OH)4]-	0	306	95	[Al3 O4(OH)(OH2)8]	[Al(OH)4]
6	1	0	6	6	6	12	0	576		no cation								[Al6 O6(OH)6(OH2)12]	[Al(OH)4]

## Sheet: chain,_monomer
s	ring	k	n	p	q	r	x	m	z	m/z (fractional)	m/z	m/z (allowed)	formula
4	0	0	1	0	0	4	0	99	3	33	33	Y	[Al(OH2)4]3+
4	0	0	1	0	1	3	0	98	2	49	49	Y	[Al(OH)(OH2)3]2+
4	0	0	1	0	2	2	0	97	1	97	97	Y	[Al(OH)2(OH2)2]+
6	0	0	1	0	0	6	0	135	3	45	45	Y	[Al(OH2)6]3+
6	0	0	1	0	1	5	0	134	2	67	67	Y	[Al(OH)(OH2)5]2+
6	0	0	1	0	2	4	0	133	1	133	133	Y	[Al(OH)2(OH2)4]+

## Sheet: chain,_dimer
s	ring	k	n	p	q	r	x	m	z	m/z (fractional)	m/z	m/z (allowed)	formula
4	0	0	2	0	0	6	0	162	6	27	27	Y	[Al2(OH2)6]6+
4	0	0	2	0	1	5	0	161	5	32.2	32.2	Y	[Al2(OH)(OH2)5]5+
4	0	0	2	0	2	4	0	160	4	40	40	Y	[Al2(OH)2(OH2)4]4+
4	0	0	2	0	3	3	0	159	3	53	53	Y	[Al2(OH)3(OH2)3]3+
4	0	0	2	0	4	2	0	158	2	79	79	Y	[Al2(OH)4(OH2)2]2+
4	0	0	2	0	5	1	0	157	1	157	157	Y	[Al2(OH)5(OH2)]+
4	0	0	2	2	0	4	0	158	2	79	79	Y	[Al2 O2(OH2)4]2+
4	0	0	2	2	1	3	0	157	1	157	157	Y	[Al2 O2(OH)(OH2)3]+
6	0	0	2	0	0	10	0	234	6	39	39	Y	[Al2(OH2)10]6+
6	0	0	2	0	1	9	0	233	5	46.6	46.6	Y	[Al2(OH)(OH2)9]5+
6	0	0	2	0	2	8	0	232	4	58	58	Y	[Al2(OH)2(OH2)8]4+
6	0	0	2	0	3	7	0	231	3	77	77	Y	[Al2(OH)3(OH2)7]3+
6	0	0	2	0	4	6	0	230	2	115	115	Y	[Al2(OH)4(OH2)6]2+
6	0	0	2	0	5	5	0	229	1	229	229	Y	[Al2(OH)5(OH2)5]+
6	0	0	2	2	0	8	0	230	2	115	115	Y	[Al2 O2(OH2)8]2+
6	0	0	2	2	1	7	0	229	1	229	229	Y	[Al2 O2(OH)(OH2)7]+

## Sheet: chain,_tetrahedral,_trimer
s	ring	k	n	p	q	r	x	m	z	m/z (fractional)	m/z	m/z (allowed)	formula
4	0	0	3	0	0	8	0	225	9	25	25	Y	[Al3(OH2)8]9+
4	0	0	3	0	1	7	0	224	8	28	28	Y	[Al3(OH)(OH2)7]8+
4	0	0	3	0	2	6	0	223	7	31.8571	31.8571	Y	[Al3(OH)2(OH2)6]7+
4	0	0	3	0	3	5	0	222	6	37	37	Y	[Al3(OH)3(OH2)5]6+
4	0	0	3	0	4	4	0	221	5	44.2	44.2	Y	[Al3(OH)4(OH2)4]5+
4	0	0	3	0	5	3	0	220	4	55	55	Y	[Al3(OH)5(OH2)3]4+
4	0	0	3	0	6	2	0	219	3	73	73	Y	[Al3(OH)6(OH2)2]3+
4	0	0	3	0	7	1	0	218	2	109	109	Y	[Al3(OH)7(OH2)]2+
4	0	0	3	0	8	0	0	217	1	217	217	Y	[Al3(OH)8]+
4	0	0	3	2	0	6	0	221	5	44.2	44.2	Y	[Al3 O2(OH2)6]5+
4	0	0	3	2	1	5	0	220	4	55	55	Y	[Al3 O2(OH)(OH2)5]4+
4	0	0	3	2	2	4	0	219	3	73	73	Y	[Al3 O2(OH)2(OH2)4]3+
4	0	0	3	2	3	3	0	218	2	109	109	Y	[Al3 O2(OH)3(OH2)3]2+
4	0	0	3	2	4	2	0	217	1	217	217	Y	[Al3 O2(OH)4(OH2)2]+
4	0	0	3	4	0	4	0	217	1	217	217	Y	[Al3 O4(OH2)4]+

## Sheet: chain,_octahedral,_trimer_
s	ring	k	n	p	q	r	x	m	z	m/z (fractional)	m/z	m/z (allowed)	formula
6	0	0	3	0	0	14	0	333	9	37	37	Y	[Al3(OH2)14]9+
6	0	0	3	0	1	13	0	332	8	41.5	41.5	Y	[Al3(OH)(OH2)13]8+
6	0	0	3	0	2	12	0	331	7	47.2857	47.2857	Y	[Al3(OH)2(OH2)12]7+
6	0	0	3	0	3	11	0	330	6	55	55	Y	[Al3(OH)3(OH2)11]6+
6	0	0	3	0	4	10	0	329	5	65.8	65.8	Y	[Al3(OH)4(OH2)10]5+
6	0	0	3	0	5	9	0	328	4	82	82	Y	[Al3(OH)5(OH2)9]4+
6	0	0	3	0	6	8	0	327	3	109	109	Y	[Al3(OH)6(OH2)8]3+
6	0	0	3	0	7	7	0	326	2	163	163	Y	[Al3(OH)7(OH2)7]2+
6	0	0	3	0	8	6	0	325	1	325	325	Y	[Al3(OH)8(OH2)6]+
6	0	0	3	2	0	12	0	329	5	65.8	65.8	Y	[Al3 O2(OH2)12]5+
6	0	0	3	2	1	11	0	328	4	82	82	Y	[Al3 O2(OH)(OH2)11]4+
6	0	0	3	2	2	10	0	327	3	109	109	Y	[Al3 O2(OH)2(OH2)10]3+
6	0	0	3	2	3	9	0	326	2	163	163	Y	[Al3 O2(OH)3(OH2)9]2+
6	0	0	3	2	4	8	0	325	1	325	325	Y	[Al3 O2(OH)4(OH2)8]+
6	0	0	3	4	0	10	0	325	1	325	325	Y	[Al3 O4(OH2)10]+

## Sheet: chain,_octahedral,_hexamer
s	ring	k	n	p	q	r	x	m	z	m/z (fractional)	m/z	m/z (allowed)	formula
6	0	0	6	0	0	26	0	630	18	35	35	Y	[Al6(OH2)26]18+
6	0	0	6	0	1	25	0	629	17	37	37	Y	[Al6(OH)(OH2)25]17+
6	0	0	6	0	2	24	0	628	16	39.25	39.25	Y	[Al6(OH)2(OH2)24]16+
6	0	0	6	0	3	23	0	627	15	41.8	41.8	Y	[Al6(OH)3(OH2)23]15+
6	0	0	6	0	4	22	0	626	14	44.7143	44.7143	Y	[Al6(OH)4(OH2)22]14+
6	0	0	6	0	5	21	0	625	13	48.0769	48.0769	Y	[Al6(OH)5(OH2)21]13+
6	0	0	6	0	6	20	0	624	12	52	52	Y	[Al6(OH)6(OH2)20]12+
6	0	0	6	0	7	19	0	623	11	56.6364	56.6364	Y	[Al6(OH)7(OH2)19]11+
6	0	0	6	0	8	18	0	622	10	62.2	62.2	Y	[Al6(OH)8(OH2)18]10+
6	0	0	6	0	9	17	0	621	9	69	69	Y	[Al6(OH)9(OH2)17]9+
6	0	0	6	0	10	16	0	620	8	77.5	77.5	Y	[Al6(OH)10(OH2)16]8+
6	0	0	6	0	11	15	0	619	7	88.4286	88.4286	Y	[Al6(OH)11(OH2)15]7+
6	0	0	6	0	12	14	0	618	6	103	103	Y	[Al6(OH)12(OH2)14]6+
6	0	0	6	0	13	13	0	617	5	123.4	123.4	Y	[Al6(OH)13(OH2)13]5+
6	0	0	6	0	14	12	0	616	4	154	154	Y	[Al6(OH)14(OH2)12]4+
6	0	0	6	0	15	11	0	615	3	205	205	Y	[Al6(OH)15(OH2)11]3+
6	0	0	6	0	16	10	0	614	2	307	307	Y	[Al6(OH)16(OH2)10]2+
6	0	0	6	0	17	9	0	613	1	613	613	Y	[Al6(OH)17(OH2)9]+

## Sheet: chain,_octahedral,_n>6
s	ring	k	n	p	q	r	x	m	z	m/z (fractional)	m/z	m/z (allowed)	formula
6	0	0	12	0	22	28	0	1202	14	85.8571	85.8571	Y	[Al12(OH)22(OH2)28]14+
6	0	0	12	0	23	27	0	1201	13	92.3846	92.3846	Y	[Al12(OH)23(OH2)27]13+
6	0	0	12	0	24	26	0	1200	12	100	100	Y	[Al12(OH)24(OH2)26]12+
6	0	0	12	0	25	25	0	1199	11	109	109	Y	[Al12(OH)25(OH2)25]11+
6	0	0	12	0	26	24	0	1198	10	119.8	119.8	Y	[Al12(OH)26(OH2)24]10+
6	0	0	12	0	27	23	0	1197	9	133	133	Y	[Al12(OH)27(OH2)23]9+
6	0	0	12	0	28	22	0	1196	8	149.5	149.5	Y	[Al12(OH)28(OH2)22]8+
6	0	0	12	0	29	21	0	1195	7	170.714	170.714	Y	[Al12(OH)29(OH2)21]7+
6	0	0	12	0	30	20	0	1194	6	199	199	Y	[Al12(OH)30(OH2)20]6+
6	0	0	12	0	31	19	0	1193	5	238.6	238.6	Y	[Al12(OH)31(OH2)19]5+
6	0	0	12	0	32	18	0	1192	4	298	298	Y	[Al12(OH)32(OH2)18]4+
6	0	0	12	0	33	17	0	1191	3	397	397	Y	[Al12(OH)33(OH2)17]3+
6	0	0	12	0	34	16	0	1190	2	595	595	Y	[Al12(OH)34(OH2)16]2+
6	0	0	12	0	35	15	0	1189	1	1189	1189	Y	[Al12(OH)35(OH2)15]+
6	0	0	12	0	36	14	0	1188		no cation		Y	#VALUE!

## Sheet: chain,_octahedral,_n=13
s	ring	k	n	p	q	r	x	m	z	m/z (fractional)	m/z	m/z (allowed)	formula
6	0	0	13	0	24	30	0	1299	15	86.6	86.6	Y	[Al13(OH)24(OH2)30]15+
6	0	0	13	0	25	29	0	1298	14	92.7143	92.7143	Y	[Al13(OH)25(OH2)29]14+
6	0	0	13	0	26	28	0	1297	13	99.7692	99.7692	Y	[Al13(OH)26(OH2)28]13+
6	0	0	13	0	27	27	0	1296	12	108	108	Y	[Al13(OH)27(OH2)27]12+
6	0	0	13	0	28	26	0	1295	11	117.727	117.727	Y	[Al13(OH)28(OH2)26]11+
6	0	0	13	0	29	25	0	1294	10	129.4	129.4	Y	[Al13(OH)29(OH2)25]10+
6	0	0	13	0	30	24	0	1293	9	143.667	143.667	Y	[Al13(OH)30(OH2)24]9+
6	0	0	13	0	31	23	0	1292	8	161.5	161.5	Y	[Al13(OH)31(OH2)23]8+
6	0	0	13	0	32	22	0	1291	7	184.429	184.429	Y	[Al13(OH)32(OH2)22]7+
6	0	0	13	0	33	21	0	1290	6	215	215	Y	[Al13(OH)33(OH2)21]6+
6	0	0	13	0	34	20	0	1289	5	257.8	257.8	Y	[Al13(OH)34(OH2)20]5+
6	0	0	13	0	35	19	0	1288	4	322	322	Y	[Al13(OH)35(OH2)19]4+
6	0	0	13	0	36	18	0	1287	3	429	429	Y	[Al13(OH)36(OH2)18]3+
6	0	0	13	0	37	17	0	1286	2	643	643	Y	[Al13(OH)37(OH2)17]2+
6	0	0	13	0	38	16	0	1285	1	1285	1285	Y	[Al13(OH)38(OH2)16]+
6	0	0	13	0	39	15	0	1284		no cation		Y	#VALUE!

## Sheet: chain,_octahedral
s	ring	k	n	p	q	r	x	m	z	m/z (fractional)	m/z	m/z (allowed)	formula
6	0	0	1	0	0	6	0	135	3	45	45	Y	[Al(OH2)6]3+
6	0	0	1	0	1	5	0	134	2	67	67	Y	[Al(OH)(OH2)5]2+
6	0	0	1	0	2	4	0	133	1	133	133	Y	[Al(OH)2(OH2)4]+
6	0	0	2	0	0	10	0	234	6	39	39	Y	[Al2(OH2)10]6+
6	0	0	2	0	1	9	0	233	5	46.6	46.6	Y	[Al2(OH)(OH2)9]5+
6	0	0	2	0	2	8	0	232	4	58	58	Y	[Al2(OH)2(OH2)8]4+
6	0	0	2	0	3	7	0	231	3	77	77	Y	[Al2(OH)3(OH2)7]3+
6	0	0	2	0	4	6	0	230	2	115	115	Y	[Al2(OH)4(OH2)6]2+
6	0	0	2	0	5	5	0	229	1	229	229	Y	[Al2(OH)5(OH2)5]+
6	0	0	2	2	0	8	0	230	2	115	115	Y	[Al2 O2(OH2)8]2+
6	0	0	2	2	1	7	0	229	1	229	229	Y	[Al2 O2(OH)(OH2)7]+
6	0	0	3	0	0	14	0	333	9	37	37	Y	[Al3(OH2)14]9+
6	0	0	3	0	1	13	0	332	8	41.5	41.5	Y	[Al3(OH)(OH2)13]8+
6	0	0	3	0	2	12	0	331	7	47.2857	47.2857	Y	[Al3(OH)2(OH2)12]7+
6	0	0	3	0	3	11	0	330	6	55	55	Y	[Al3(OH)3(OH2)11]6+
6	0	0	3	0	4	10	0	329	5	65.8	65.8	Y	[Al3(OH)4(OH2)10]5+
6	0	0	3	0	5	9	0	328	4	82	82	Y	[Al3(OH)5(OH2)9]4+
6	0	0	3	0	6	8	0	327	3	109	109	Y	[Al3(OH)6(OH2)8]3+
6	0	0	3	0	7	7	0	326	2	163	163	Y	[Al3(OH)7(OH2)7]2+
6	0	0	3	0	8	6	0	325	1	325	325	Y	[Al3(OH)8(OH2)6]+
6	0	0	3	2	0	12	0	329	5	65.8	65.8	Y	[Al3 O2(OH2)12]5+
6	0	0	3	2	1	11	0	328	4	82	82	Y	[Al3 O2(OH)(OH2)11]4+
6	0	0	3	2	2	10	0	327	3	109	109	Y	[Al3 O2(OH)2(OH2)10]3+
6	0	0	3	2	3	9	0	326	2	163	163	Y	[Al3 O2(OH)3(OH2)9]2+
6	0	0	3	2	4	8	0	325	1	325	325	Y	[Al3 O2(OH)4(OH2)8]+
6	0	0	3	4	0	10	0	325	1	325	325	Y	[Al3 O4(OH2)10]+
6	0	0	4	0	0	18	0	432	12	36	36	Y	[Al4(OH2)18]12+
6	0	0	4	0	1	17	0	431	11	39.1818	39.1818	Y	[Al4(OH)(OH2)17]11+
6	0	0	4	0	2	16	0	430	10	43	43	Y	[Al4(OH)2(OH2)16]10+
6	0	0	4	0	3	15	0	429	9	47.6667	47.6667	Y	[Al4(OH)3(OH2)15]9+
6	0	0	4	0	4	14	0	428	8	53.5	53.5	Y	[Al4(OH)4(OH2)14]8+
6	0	0	4	0	5	13	0	427	7	61	61	Y	[Al4(OH)5(OH2)13]7+
6	0	0	4	0	6	12	0	426	6	71	71	Y	[Al4(OH)6(OH2)12]6+
6	0	0	4	0	7	11	0	425	5	85	85	Y	[Al4(OH)7(OH2)11]5+
6	0	0	4	0	8	10	0	424	4	106	106	Y	[Al4(OH)8(OH2)10]4+
6	0	0	4	0	9	9	0	423	3	141	141	Y	[Al4(OH)9(OH2)9]3+
6	0	0	5	0	0	22	0	531	15	35.4	35.4	Y	[Al5(OH2)22]15+
6	0	0	5	0	1	21	0	530	14	37.8571	37.8571	Y	[Al5(OH)(OH2)21]14+
6	0	0	5	0	2	20	0	529	13	40.6923	40.6923	Y	[Al5(OH)2(OH2)20]13+
6	0	0	5	0	3	19	0	528	12	44	44	Y	[Al5(OH)3(OH2)19]12+
6	0	0	5	0	4	18	0	527	11	47.9091	47.9091	Y	[Al5(OH)4(OH2)18]11+
6	0	0	5	0	5	17	0	526	10	52.6	52.6	Y	[Al5(OH)5(OH2)17]10+
6	0	0	5	0	6	16	0	525	9	58.3333	58.3333	Y	[Al5(OH)6(OH2)16]9+
6	0	0	5	0	7	15	0	524	8	65.5	65.5	Y	[Al5(OH)7(OH2)15]8+
6	0	0	5	0	8	14	0	523	7	74.7143	74.7143	Y	[Al5(OH)8(OH2)14]7+
6	0	0	5	0	9	13	0	522	6	87	87	Y	[Al5(OH)9(OH2)13]6+
6	0	0	5	0	10	12	0	521	5	104.2	104.2	Y	[Al5(OH)10(OH2)12]5+
6	0	0	5	0	11	11	0	520	4	130	130	Y	[Al5(OH)11(OH2)11]4+
6	0	0	5	0	12	10	0	519	3	173	173	Y	[Al5(OH)12(OH2)10]3+
6	0	0	5	0	13	9	0	518	2	259	259	Y	[Al5(OH)13(OH2)9]2+
6	0	0	5	0	14	8	0	517	1	517	517	Y	[Al5(OH)14(OH2)8]+
6	0	0	5	2	0	20	0	527	11	47.9091	47.9091	Y	[Al5 O2(OH2)20]11+
6	0	0	5	2	1	19	0	526	10	52.6	52.6	Y	[Al5 O2(OH)(OH2)19]10+
6	0	0	5	2	2	18	0	525	9	58.3333	58.3333	Y	[Al5 O2(OH)2(OH2)18]9+
6	0	0	5	2	3	17	0	524	8	65.5	65.5	Y	[Al5 O2(OH)3(OH2)17]8+
6	0	0	5	2	4	16	0	523	7	74.7143	74.7143	Y	[Al5 O2(OH)4(OH2)16]7+
6	0	0	5	2	5	15	0	522	6	87	87	Y	[Al5 O2(OH)5(OH2)15]6+
6	0	0	5	2	6	14	0	521	5	104.2	104.2	Y	[Al5 O2(OH)6(OH2)14]5+
6	0	0	5	2	7	13	0	520	4	130	130	Y	[Al5 O2(OH)7(OH2)13]4+
6	0	0	5	2	8	12	0	519	3	173	173	Y	[Al5 O2(OH)8(OH2)12]3+
6	0	0	5	2	9	11	0	518	2	259	259	Y	[Al5 O2(OH)9(OH2)11]2+
6	0	0	5	2	10	10	0	517	1	517	517	Y	[Al5 O2(OH)10(OH2)10]+
6	0	0	5	4	0	18	0	523	7	74.7143	74.7143	Y	[Al5 O4(OH2)18]7+
6	0	0	5	4	1	17	0	522	6	87	87	Y	[Al5 O4(OH)(OH2)17]6+
6	0	0	5	4	2	16	0	521	5	104.2	104.2	Y	[Al5 O4(OH)2(OH2)16]5+
6	0	0	5	4	3	15	0	520	4	130	130	Y	[Al5 O4(OH)3(OH2)15]4+
6	0	0	5	4	4	14	0	519	3	173	173	Y	[Al5 O4(OH)4(OH2)14]3+
6	0	0	5	4	5	13	0	518	2	259	259	Y	[Al5 O4(OH)5(OH2)13]2+
6	0	0	5	4	6	12	0	517	1	517	517	Y	[Al5 O4(OH)6(OH2)12]+
6	0	0	5	6	0	16	0	519	3	173	173	Y	[Al5 O6(OH2)16]3+
6	0	0	5	6	1	15	0	518	2	259	259	Y	[Al5 O6(OH)(OH2)15]2+
6	0	0	5	6	2	14	0	517	1	517	517	Y	[Al5 O6(OH)2(OH2)14]+
6	0	0	6	0	0	26	0	630	18	35	35	Y	[Al6(OH2)26]18+
6	0	0	6	0	1	25	0	629	17	37	37	Y	[Al6(OH)(OH2)25]17+
6	0	0	6	0	2	24	0	628	16	39.25	39.25	Y	[Al6(OH)2(OH2)24]16+
6	0	0	6	0	3	23	0	627	15	41.8	41.8	Y	[Al6(OH)3(OH2)23]15+
6	0	0	6	0	4	22	0	626	14	44.7143	44.7143	Y	[Al6(OH)4(OH2)22]14+
6	0	0	6	0	5	21	0	625	13	48.0769	48.0769	Y	[Al6(OH)5(OH2)21]13+
6	0	0	6	0	6	20	0	624	12	52	52	Y	[Al6(OH)6(OH2)20]12+
6	0	0	6	0	7	19	0	623	11	56.6364	56.6364	Y	[Al6(OH)7(OH2)19]11+
6	0	0	6	0	8	18	0	622	10	62.2	62.2	Y	[Al6(OH)8(OH2)18]10+
6	0	0	6	0	9	17	0	621	9	69	69	Y	[Al6(OH)9(OH2)17]9+
6	0	0	6	0	10	16	0	620	8	77.5	77.5	Y	[Al6(OH)10(OH2)16]8+
6	0	0	6	0	11	15	0	619	7	88.4286	88.4286	Y	[Al6(OH)11(OH2)15]7+
6	0	0	6	0	12	14	0	618	6	103	103	Y	[Al6(OH)12(OH2)14]6+
6	0	0	6	0	13	13	0	617	5	123.4	123.4	Y	[Al6(OH)13(OH2)13]5+
6	0	0	6	0	14	12	0	616	4	154	154	Y	[Al6(OH)14(OH2)12]4+
6	0	0	6	0	15	11	0	615	3	205	205	Y	[Al6(OH)15(OH2)11]3+
6	0	0	6	0	16	10	0	614	2	307	307	Y	[Al6(OH)16(OH2)10]2+
6	0	0	6	0	17	9	0	613	1	613	613	Y	[Al6(OH)17(OH2)9]+
6	0	0	6	2	0	24	0	626	14	44.7143	44.7143	Y	[Al6 O2(OH2)24]14+
6	0	0	6	2	1	23	0	625	13	48.0769	48.0769	Y	[Al6 O2(OH)(OH2)23]13+
6	0	0	6	2	2	22	0	624	12	52	52	Y	[Al6 O2(OH)2(OH2)22]12+
6	0	0	6	2	3	21	0	623	11	56.6364	56.6364	Y	[Al6 O2(OH)3(OH2)21]11+
6	0	0	6	2	4	20	0	622	10	62.2	62.2	Y	[Al6 O2(OH)4(OH2)20]10+
6	0	0	6	2	5	19	0	621	9	69	69	Y	[Al6 O2(OH)5(OH2)19]9+
6	0	0	6	2	6	18	0	620	8	77.5	77.5	Y	[Al6 O2(OH)6(OH2)18]8+
6	0	0	6	2	7	17	0	619	7	88.4286	88.4286	Y	[Al6 O2(OH)7(OH2)17]7+
6	0	0	6	2	8	16	0	618	6	103	103	Y	[Al6 O2(OH)8(OH2)16]6+
6	0	0	6	2	9	15	0	617	5	123.4	123.4	Y	[Al6 O2(OH)9(OH2)15]5+
6	0	0	6	2	10	14	0	616	4	154	154	Y	[Al6 O2(OH)10(OH2)14]4+
6	0	0	6	2	11	13	0	615	3	205	205	Y	[Al6 O2(OH)11(OH2)13]3+
6	0	0	6	2	12	12	0	614	2	307	307	Y	[Al6 O2(OH)12(OH2)12]2+
6	0	0	6	2	13	11	0	613	1	613	613	Y	[Al6 O2(OH)13(OH2)11]+
6	0	0	6	4	0	22	0	622	10	62.2	62.2	Y	[Al6 O4(OH2)22]10+
6	0	0	6	4	1	21	0	621	9	69	69	Y	[Al6 O4(OH)(OH2)21]9+
6	0	0	6	4	2	20	0	620	8	77.5	77.5	Y	[Al6 O4(OH)2(OH2)20]8+
6	0	0	6	4	3	19	0	619	7	88.4286	88.4286	Y	[Al6 O4(OH)3(OH2)19]7+
6	0	0	6	4	4	18	0	618	6	103	103	Y	[Al6 O4(OH)4(OH2)18]6+
6	0	0	6	4	5	17	0	617	5	123.4	123.4	Y	[Al6 O4(OH)5(OH2)17]5+
6	0	0	6	4	6	16	0	616	4	154	154	Y	[Al6 O4(OH)6(OH2)16]4+
6	0	0	6	4	7	15	0	615	3	205	205	Y	[Al6 O4(OH)7(OH2)15]3+
6	0	0	6	4	8	14	0	614	2	307	307	Y	[Al6 O4(OH)8(OH2)14]2+
6	0	0	6	4	9	13	0	613	1	613	613	Y	[Al6 O4(OH)9(OH2)13]+
6	0	0	6	6	0	20	0	618	6	103	103	Y	[Al6 O6(OH2)20]6+
6	0	0	6	6	1	19	0	617	5	123.4	123.4	Y	[Al6 O6(OH)(OH2)19]5+
6	0	0	6	6	2	18	0	616	4	154	154	Y	[Al6 O6(OH)2(OH2)18]4+
6	0	0	6	6	3	17	0	615	3	205	205	Y	[Al6 O6(OH)3(OH2)17]3+
6	0	0	6	6	4	16	0	614	2	307	307	Y	[Al6 O6(OH)4(OH2)16]2+
6	0	0	6	6	5	15	0	613	1	613	613	Y	[Al6 O6(OH)5(OH2)15]+
6	0	0	6	8	0	18	0	614	2	307	307	Y	[Al6 O8(OH2)18]2+
6	0	0	6	8	1	17	0	613	1	613	613	Y	[Al6 O8(OH)(OH2)17]+

## Sheet: ring,_octahedral,_hexamer
s	ring	k	n	p	q	r	x	m	z	m/z (fractional)	m/z	m/z (allowed)	ring formula
6	1	0	6	0	12	12	0	582	6	97	97	Y	[Al6(OH)12(OH2)12]6+
6	1	0	6	0	10	14	0	584	8	73	73	Y	[Al6(OH)10(OH2)14]8+
6	1	0	6	0	8	16	0	586	10	58.6	58.6	Y	[Al6(OH)8(OH2)16]10+
6	1	0	6	0	6	18	0	588	12	49	49	Y	[Al6(OH)6(OH2)18]12+
6	1	0	6	0	4	20	0	590	14	42.1429	42.1429	Y	[Al6(OH)4(OH2)20]14+
6	1	0	6	0	2	22	0	592	16	37	37	Y	[Al6(OH)2(OH2)22]16+
6	1	0	6	0	0	24	0	594	18	33	33	Y	[Al6(OH2)24]18+
6	1	0	6	2	10	12	0	580	4	145	145	Y	[Al6 O2(OH)10(OH2)12]4+
6	1	0	6	2	8	14	0	582	6	97	97	Y	[Al6 O2(OH)8(OH2)14]6+
6	1	0	6	2	6	16	0	584	8	73	73	Y	[Al6 O2(OH)6(OH2)16]8+
6	1	0	6	2	4	18	0	586	10	58.6	58.6	Y	[Al6 O2(OH)4(OH2)18]10+
6	1	0	6	2	2	20	0	588	12	49	49	Y	[Al6 O2(OH)2(OH2)20]12+
6	1	0	6	2	0	22	0	590	14	42.1429	42.1429	Y	[Al6 O2(OH2)22]14+
6	1	0	6	4	8	12	0	578	2	289	289	Y	[Al6 O4(OH)8(OH2)12]2+
6	1	0	6	4	6	14	0	580	4	145	145	Y	[Al6 O4(OH)6(OH2)14]4+
6	1	0	6	4	4	16	0	582	6	97	97	Y	[Al6 O4(OH)4(OH2)16]6+
6	1	0	6	4	2	18	0	584	8	73	73	Y	[Al6 O4(OH)2(OH2)18]8+
6	1	0	6	4	0	20	0	586	10	58.6	58.6	Y	[Al6 O4(OH2)20]10+
6	1	0	6	6	6	12	0	576		no cation
6	1	0	6	6	4	14	0	578	2	289	289	Y	[Al6 O6(OH)4(OH2)14]2+
6	1	0	6	6	2	16	0	580	4	145	145	Y	[Al6 O6(OH)2(OH2)16]4+
6	1	0	6	6	0	18	0	582	6	97	97	Y	[Al6 O6(OH2)18]6+

[truncated: 10 more sheets: Keggin,_hybrid,_tridecamer, chain,_tetrahedral, chain,_tetrahedral,_allpositive, chain,_tetrahedral,_observable, chain,_octahedral,_observable, chain,_observable, ring,_hexamer,_observable, Keggin,_tridecamer,_observable, unipositive,_observable, allpositive,_observable]
